# Supplementary material for: Valorization of By-Products from Biofuel Biorefineries: Extraction and Purification of Bioactive Molecules from Post-Fermentation Corn Oil
Source: MDPI journal article supplement (doi:10.3390/foods11020153), 2022-01-07
Supplement: s1 [file s1]

# Valorization of by-products from biofuel biorefineries: extraction and purification of bioactive molecules from post-fermentation corn oil

**Francesco Cairone<sup>1</sup>, Stefania Cesa<sup>1</sup>, Alessia Ciogli<sup>1</sup>, Giancarlo Fabrizi<sup>1</sup>, Antonella Goggiamani<sup>1</sup>, Antonia Iazzetti<sup>1,2\*</sup>, Gabriella Di Lena<sup>3\*</sup>, Jose Sanchez del Pulgar<sup>3</sup>, Massimo Lucarini<sup>3</sup>, Luca Cantò<sup>4</sup>, Gokhan Zengin<sup>5</sup> and Petra Ondrejčková<sup>6</sup>**

<sup>1</sup> Affiliation 1; Department of Drug Chemistry and Technology, Sapienza, University of Rome, P.le A. Moro 5, 00185 Rome, Italy. [francesco.cairone@uniroma1.it](mailto:francesco.cairone@uniroma1.it); [stefania.cesa@uniroma1.it](mailto:stefania.cesa@uniroma1.it); [alessia.ciogli@uniroma1.it](mailto:alessia.ciogli@uniroma1.it); [giancarlo.fabrizi@uniroma1.it](mailto:giancarlo.fabrizi@uniroma1.it); [antonella.goggiamani@uniroma1.it](mailto:antonella.goggiamani@uniroma1.it).

<sup>2</sup> Affiliation 2; Dipartimento di Scienze Biotechnologiche di base, Cliniche Intensivologiche e Perioperatorie, Università Cattolica del Sacro Cuore, L.go Francesco Vito 1, 00168 Rome, Italy. [antonia.iazzetti@unicatt.it](mailto:antonia.iazzetti@unicatt.it).

<sup>3</sup> Affiliation 3; CREA Research Centre for Food and Nutrition, Via Ardeatina 546, 00178 Rome, Italy; [gabriella.dilena@crea.gov.it](mailto:gabriella.dilena@crea.gov.it); [jsapuri@hotmail.com](mailto:jsapuri@hotmail.com); [massimo.lucarini@crea.gov.it](mailto:massimo.lucarini@crea.gov.it)

<sup>4</sup> Affiliation 4; Department of Pharmacy, University "G. d'Annunzio" of Chieti-Pescara, 66100 Chieti, Italy, [luca.canto@yahoo.it](mailto:luca.canto@yahoo.it).

<sup>5</sup> Affiliation 5; Department of Biology, Science Faculty, Selcuk University, Konya 42130, Turkey, [gokhanzengin@selcuk.edu.tr](mailto:gokhanzengin@selcuk.edu.tr)

<sup>6</sup> Affiliation 6; ENVIRAL a.s., Trnavská Cesta, 920 41 Leopoldov, Slovakia, [Ondrejickova@enviengroup.eu](mailto:Ondrejickova@enviengroup.eu)

\* Correspondence: [antonia.iazzetti@unicatt.it](mailto:antonia.iazzetti@unicatt.it); [gabriella.dilena@crea.gov.it](mailto:gabriella.dilena@crea.gov.it)

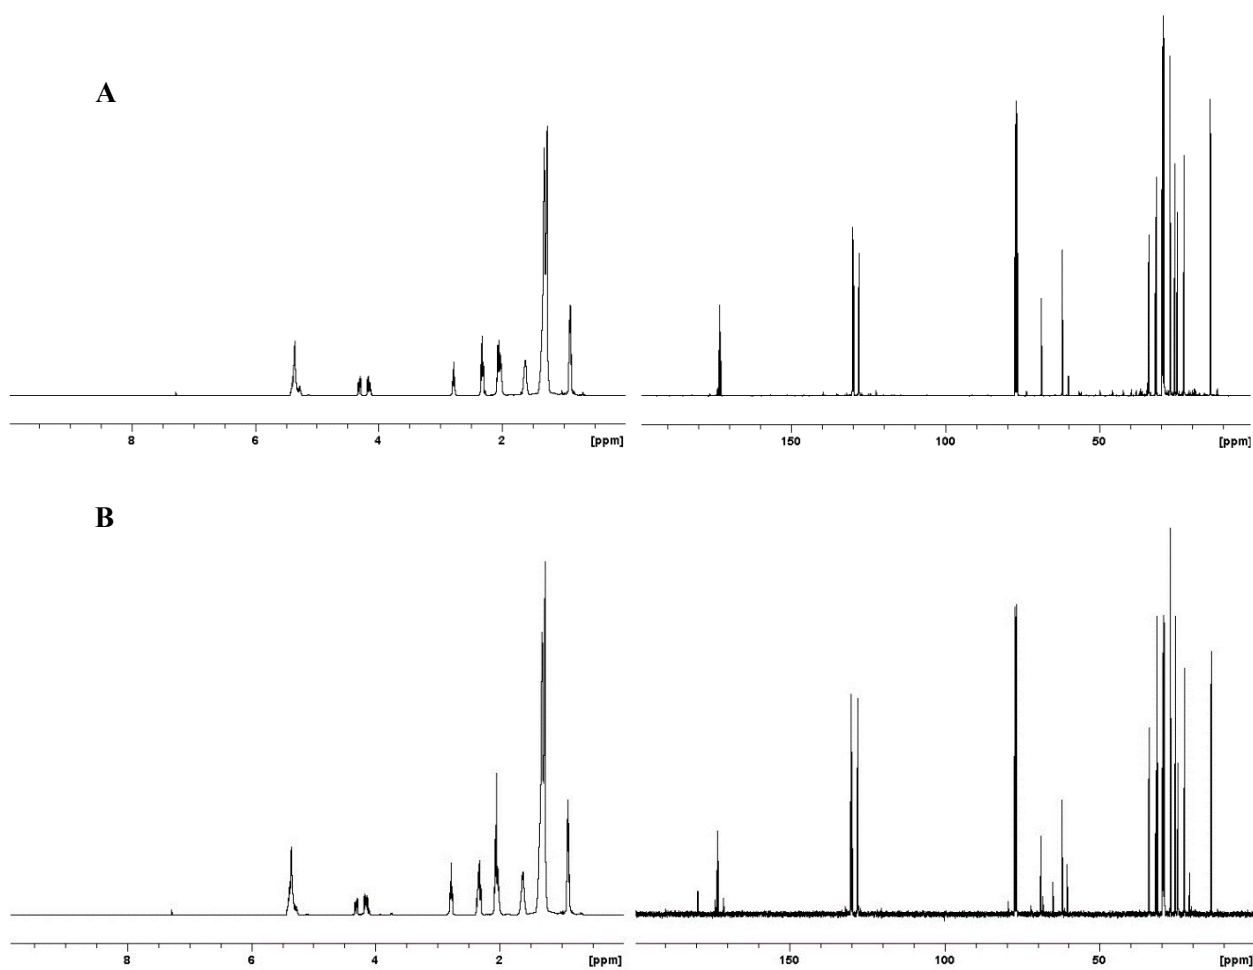

**Figure S1.**  $^1\text{H}$  and  $^{13}\text{C}$  NMR spectra of SPE-BES fraction 1 (Panel A) and SPE-BES fraction 2 (Panel B).

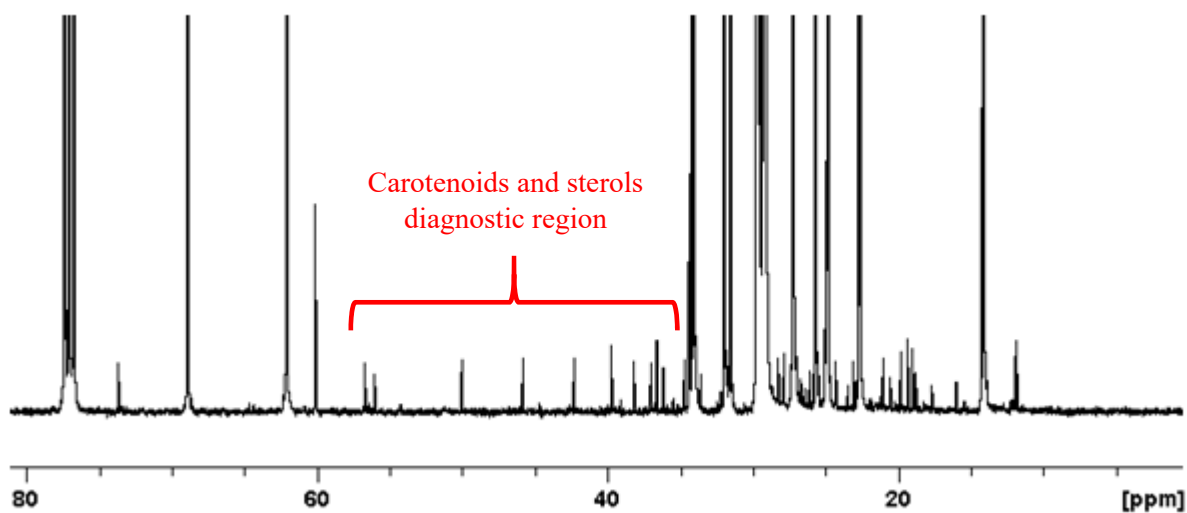

**Figure S2.** Expansion of  $^{13}\text{C}$  NMR spectra of fraction 2 related to carotenoids and sterols diagnostic region.

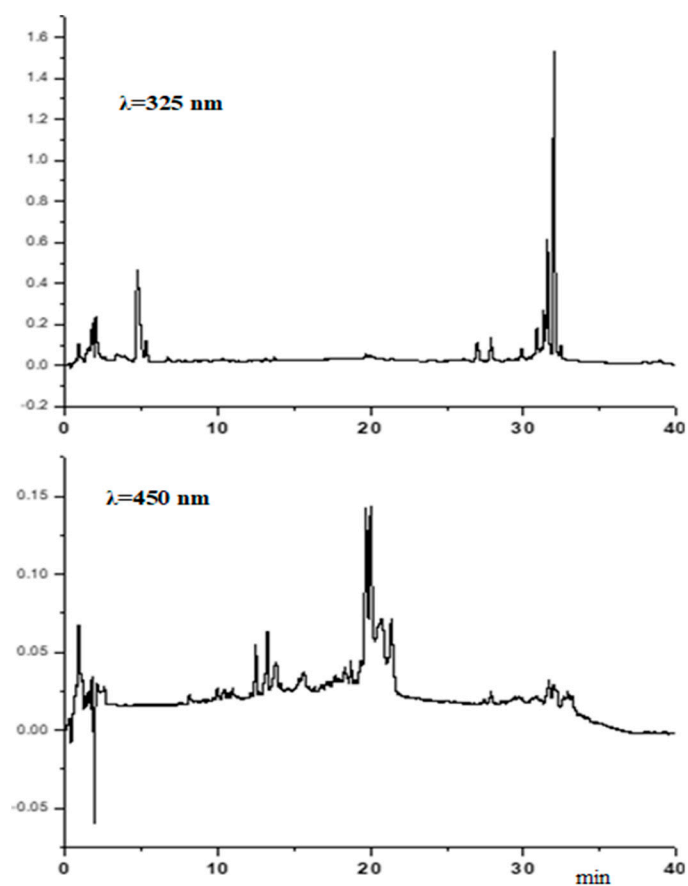

**Figure S3.** HPLC analyses of fraction 2 performed at 325 nm and 450 nm.

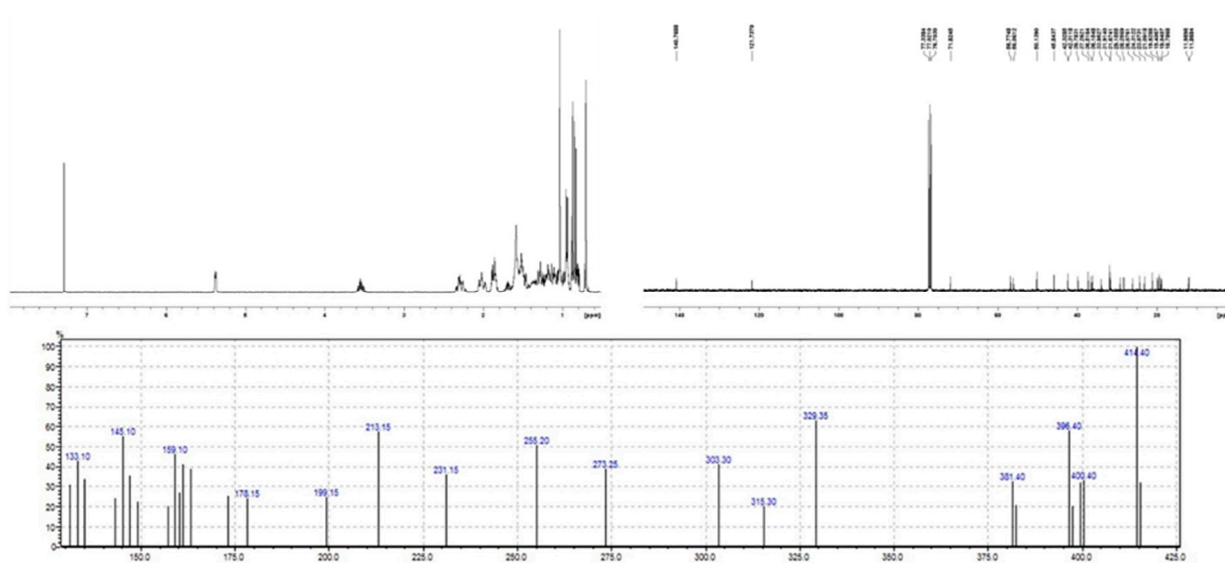

**Figure S4.**  $^1\text{H}$  NMR,  $^{13}\text{C}$  NMR and DI-MS of purified fraction 8a.

**Table S1** Fatty acid profile of low-polarity fractions (FR4-FR5) and medium-polarity fraction (FR6) obtained by SPE fractionation strategy. Values represent % of total fatty acids.<sup>a</sup>

|                               | FR 4                          |      | FR 5  |      | FR 6  |      |
|-------------------------------|-------------------------------|------|-------|------|-------|------|
|                               | mean                          | sd   | mean  | sd   | mean  | sd   |
|                               | <i>% of total fatty acids</i> |      |       |      |       |      |
| <b>C12:0</b>                  | -                             |      | -     |      | -     |      |
| <b>C14:0</b>                  | -                             |      | -     |      | -     |      |
| <b>C15:0</b>                  | -                             |      | -     |      | -     |      |
| <b>C16:0</b>                  | 17.13                         | 0.87 | 18.24 | 3.53 | 17.36 | 3.10 |
| <b>C16:0-Ethyl ester</b>      | 3.04                          | 3.30 | 0.78  | 0.71 | -     |      |
| <b>C16:1 n-7</b>              | -                             |      | -     |      | -     |      |
| <b>C17:0</b>                  | -                             |      | -     |      | -     |      |
| <b>C18:0</b>                  | 2.43                          | 0.37 | 3.53  | 0.78 | 2.43  | 0.49 |
| <b>C18:1n-9</b>               | 28.22                         | 6.75 | 27.83 | 3.25 | 22.28 | 2.18 |
| <b>C18:1n-7</b>               | 0.75                          | 0.06 | 0.92  | 0.08 | 0.73  | 0.52 |
| <b>C18:1 -Ethyl ester</b>     | 1.90                          | 1.26 | 0.58  | 0.19 | -     |      |
| <b>C18:2 n-6</b>              | 41.18                         | 1.99 | 44.85 | 3.53 | 55.54 | 1.95 |
| <b>C18:2 n-6 -Ethyl ester</b> | 4.26                          | 4.33 | 2.32  | 1.24 | -     |      |
| <b>C18:3 n-3</b>              | 1.06                          | 0.18 | 0.91  | 0.07 | 1.78  | 0.12 |
| <b>C20:0</b>                  | 0.69                          | 0.21 | 0.60  | 0.04 | 0.25  | -    |
| <b>C20:1 n-9</b>              | 0.28                          | 0.02 | 0.33  | 0.03 | 0.15  | -    |
| <b>C20:2 n-6</b>              | -                             |      | -     |      | -     |      |
| <b>C22:0</b>                  | -                             |      | 0.23  | -    | -     |      |
| <b>C24:0</b>                  | -                             |      | 0.28  | -    | -     |      |
| <b>Total SFA</b>              | 23.06                         | 3.03 | 23.32 | 4.76 | 19.87 | 3.44 |
| <b>Total MUFA</b>             | 30.43                         | 5.55 | 29.35 | 2.81 | 22.81 | 1.89 |
| <b>Total PUFA</b>             | 46.50                         | 2.52 | 47.30 | 1.95 | 57.31 | 1.84 |
| <b>Total n-6 PUFA</b>         | 45.44                         | 2.38 | 46.40 | 1.93 | 55.54 | 1.95 |
| <b>Total n-3 PUFA</b>         | 1.06                          | 0.18 | 0.91  | 0.07 | 1.78  | 0.12 |
| <b>n-6/n-3 PUFA ratio</b>     | 43.66                         | 6.52 | 51.27 | 3.65 | 31.40 | 3.02 |
| <b>PUFA/SFA ratio</b>         | 2.03                          | 0.16 | 2.10  | 0.54 | 2.96  | 0.65 |

- not detected

<sup>a</sup> Analyses have been carried out according to the procedure described in reference 7
